# Supplementary material for: Identification of potential genomic regions and candidate genes for egg albumen quality by a genome-wide association study
Source: Copernicus journal article supplement (doi:10.5194/aab-62-113-2019), 2019-03-25
Supplement: Supplementary file 1 [file aab-62-113-2019-supplement.zip]

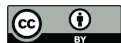

## *Supplement of*

# **Identification of potential genomic regions and candidate genes for egg albumen quality by a genome-wide association study**

**Liang Qu et al.**

*Correspondence to:* Kehua Wang (sqbreeding@126.com) and Honglin Liu (liuhonglin@njau.edu.cn)

- aab-62-113-2019-supplement-title-page.pdf
- Additional file 1.xlsx
- Fig S1.pdf

The copyright of individual parts of the supplement might differ from the CC BY 4.0 License.
