# Supplementary figures and images for: Identification of potential genomic regions and candidate genes for egg albumen quality by a genome-wide association study
Source: Copernicus journal article supplement (doi:10.5194/aab-62-113-2019), 2019-03-25

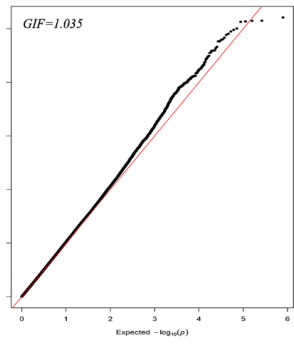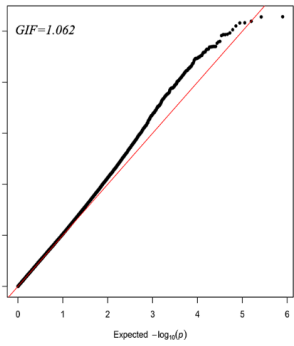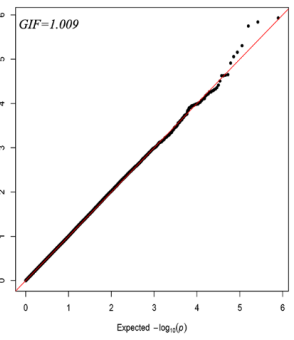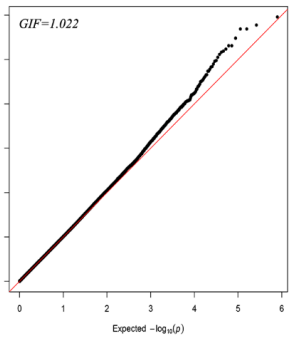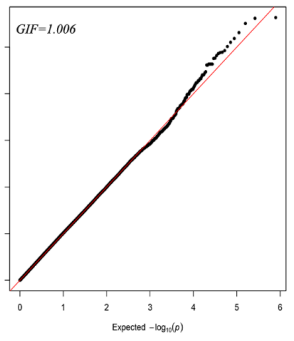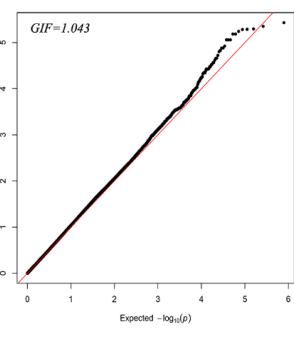

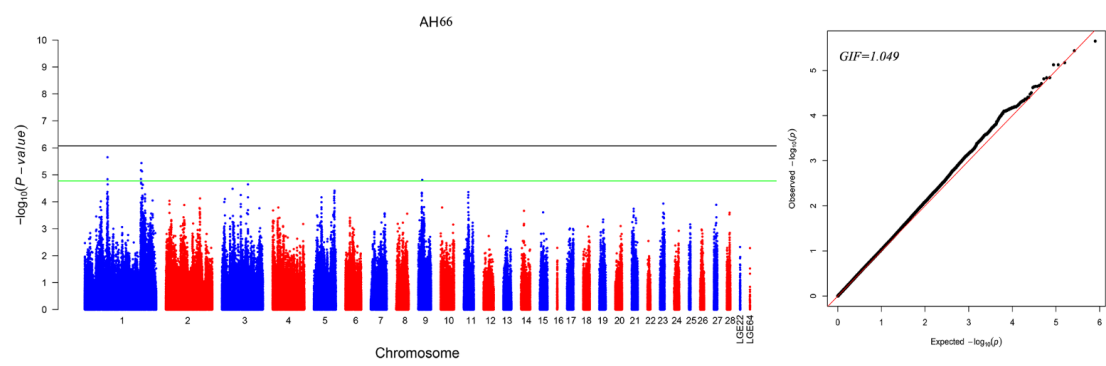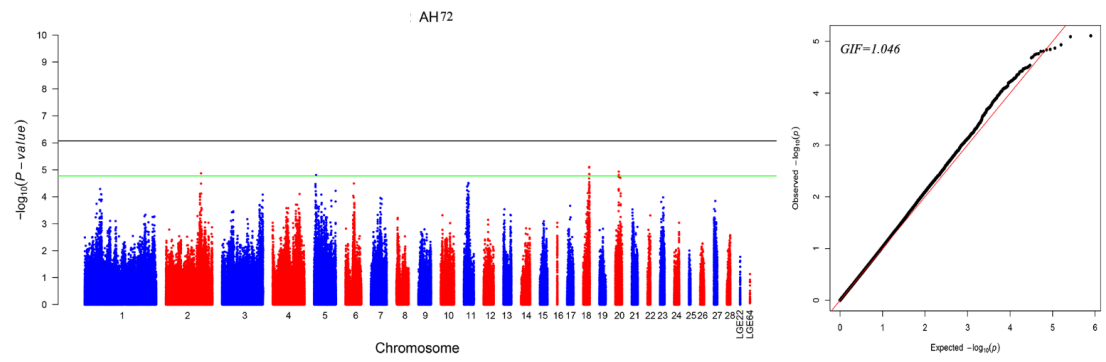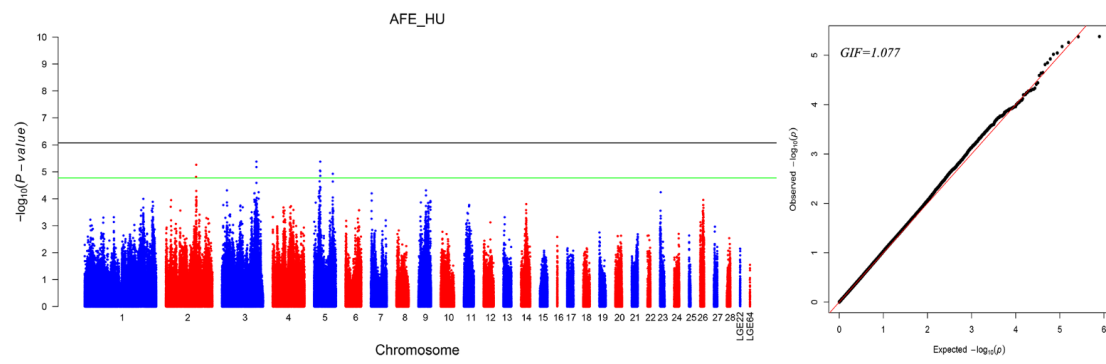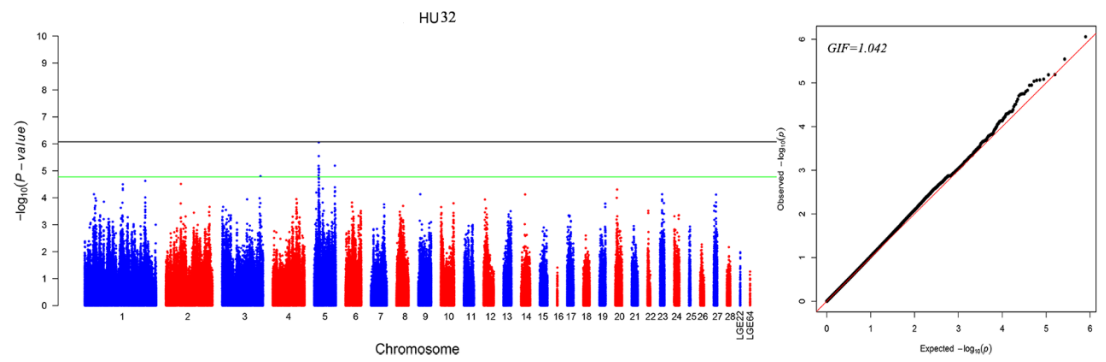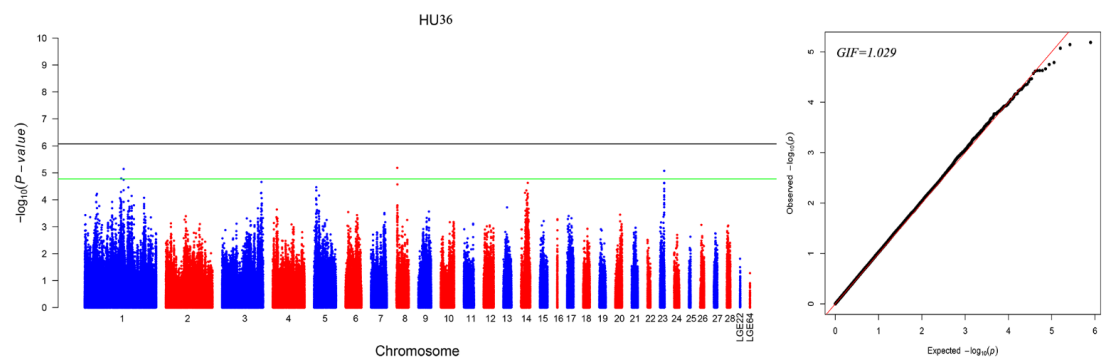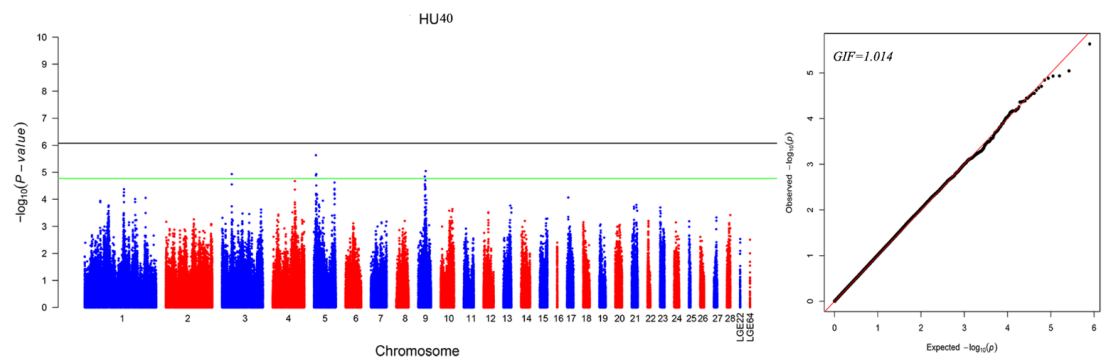

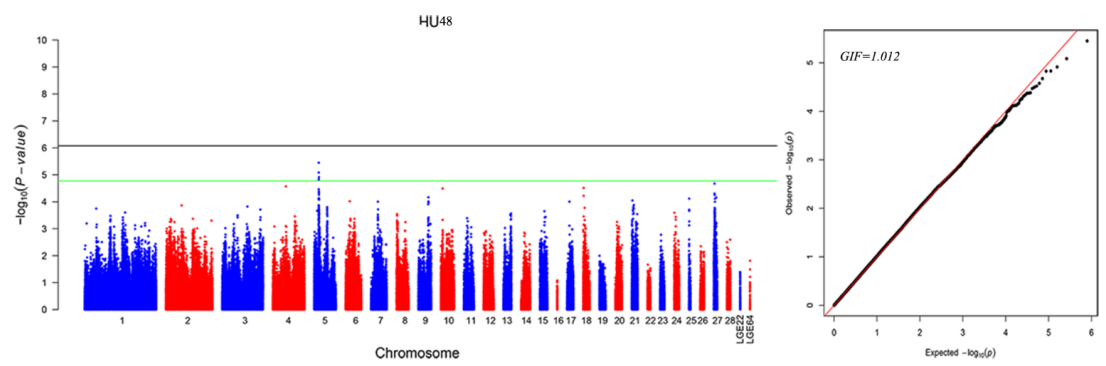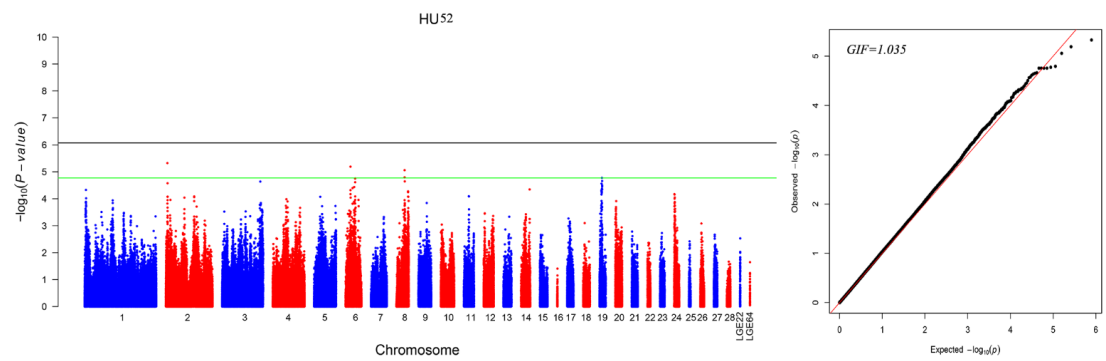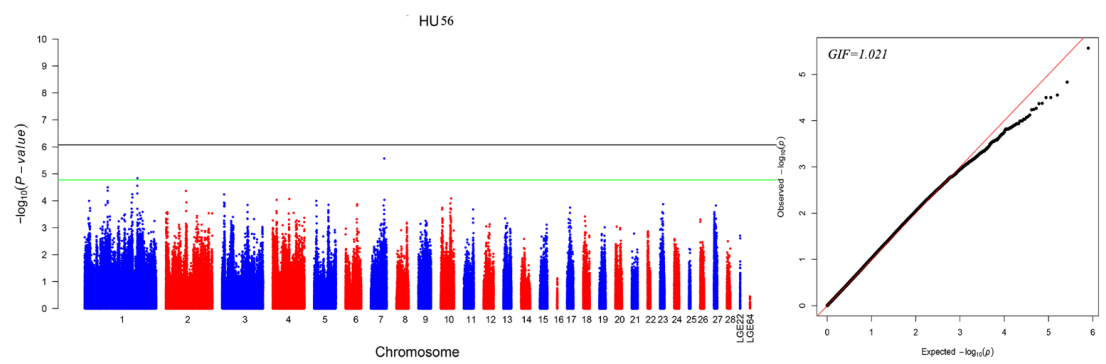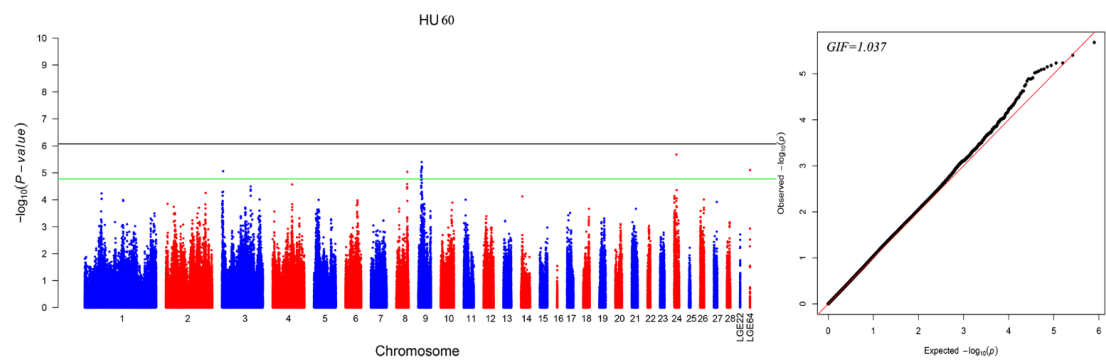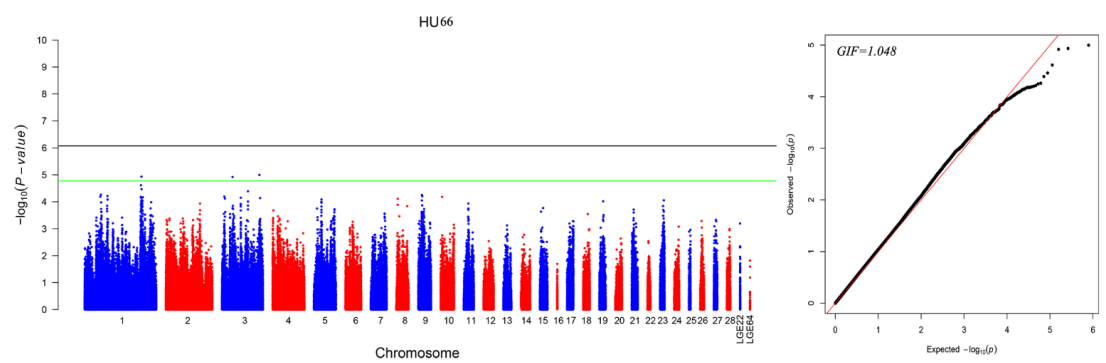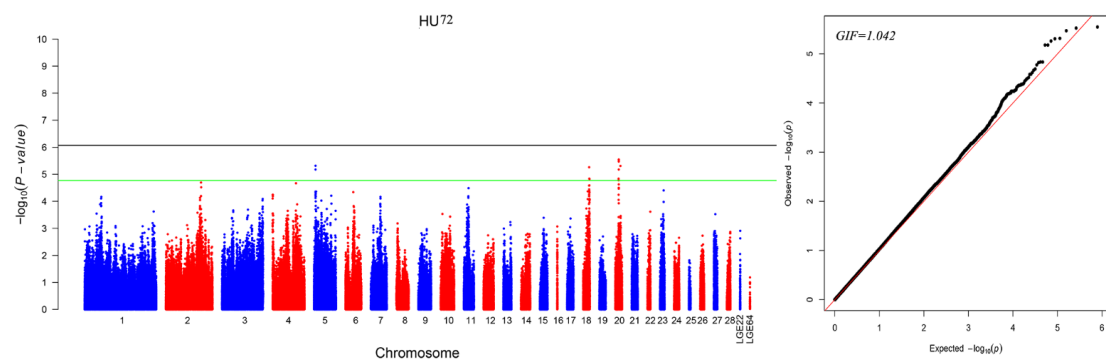

Supplement: Supplementary file 2 [file aab-62-113-2019-supplement.zip]
